# Supplementary material
Source: publisher site journal article supplement (https://static.cambridge.org/content/id/urn:cambridge.org:id:article:S0967199419000741/resource/name/S0967199419000741supp001.docx)
Supplement: Supplementary file 1 [file S0967199419000741supp001.docx]

**Table S1.** Proteins of *Mazama gouazoubira* follicular fluid separated by one-dimensional electrophoresis (SDS-PAGE) and identified by mass spectrometry (ESI-Q-TOF). Band number refers to those shown in the gel in Figure 2

| Protein | Band | Accession no. | Organism | MS/MS protein score | Sequence covered (%) | Matched peptides | m/z | MM (kDa) | z |
| --- | --- | --- | --- | --- | --- | --- | --- | --- | --- |
| Alpha-1B-glycoprotein | 9 | A1BG_BOVIN | *Bos taurus* | 54 | 2 | (487)SLLSELSDPVELR(499) | 729.3936 | 53.554 | 2 |
| Alpha-2-macroglobulin | 1 | A2MG_BOVIN | *Bos taurus* | 190 | 4 | (339)GATEITTTITK(349) | 568.3106 | 167.576 | 2 |
| Apolipoprotein A-I |  |  |  |  |  | (350)LSFVTVDSNLR(360) | 625.8399 |  | 2 |
|  |  |  |  |  | (362)GIPFTGKVLLVDGK(375) | 722.4100 |  | 2 |
|  |  |  |  |  | (972)LPPNVVEESAR(982) | 605.8264 |  | 2 |
|  |  |  |  |  | (983)ASFSVLGDILGSAMR + Oxidation (M)(997) | 770.3926 |  | 2 |
|  |  |  |  |  | (1327)FQVENSNR(1334) | 497.7370 |  | 2 |
| 8 | APOA1_BOVIN | *Bos taurus* | 72 | 7 | (142)VAPLGEEFR(150) | 509.2721 | 30.276 | 2 |
|  |  |  |  |  | (249)VSILAAIDEASK(260) | 608.8392 |  | 2 |
| 13 | APOA1_BOVIN | *Bos taurus* | 300 | 20 | (34)VKDFATVYVEAIK(46) | 741.9136 | 30.276 | 2 |
|  |  |  |  |  | (36)DFATVYVEAIK(46) | 628.3290 |  | 2 |
|  |  |  |  |  | (142)VAPLGEEFR(150) | 509.2641 |  | 2 |
|  |  |  |  |  | (164)LSPLAQELR(172) | 513.7902 |  | 2 |
|  |  |  |  |  | (164)LSPLAQELR(172) | 513.7946 |  | 2 |
|  |  |  |  |  | (238)QGLLPVLESLK(248) | 598.8629 |  | 2 |
|  |  |  |  |  | (249)VSILAAIDEASK(260) | 608.8379 |  | 2 |
|  |  |  |  |  | (249)VSILAAIDEASK(260) | 608.8416 |  | 2 |
|  |  |  |  |  | (249)VSILAAIDEASKK(261) | 448.9205 |  | 3 |
|  |  |  |  |  | (249)VSILAAIDEASKK(261) | 672.8896 |  | 2 |
| Ceruloplasmin | 5 | CERU_SHEEP | *Ovis aries* | 53 | 1 | (70)AVYLQYTDENFR(81) | 790.7089 | 119.126 | 2 |
| Complement C3 | 2 | CO3_BOVIN | *Bos taurus* | 259 | 5 | (136)TIYTPGSTVLYR(147) | 685.7041 | 187.253 | 2 |
|  |  |  |  |  | (281)ISLTHSLTR(289) | 513.7776 |  | 2 |
|  |  |  |  |  | (281)ISLTHSLTR(289) | 514.2882 |  | 2 |
|  |  |  |  |  | (385)HIPVVTQGSNVQSLTQDDGVAK(406) | 764.8946 |  | 3 |
|  |  |  |  |  | (438)TMQALPYNTQGNSNNYLHLSVPR + Oxidation (M)(460) | 878.6152 |  | 3 |
|  |  |  |  |  | (438)TMQALPYNTQGNSNNYLHLSVPR + Oxidation (M)(460) | 878.9506 |  | 3 |
|  |  |  |  |  | (841)NEQVEIR(847) | 444.2302 |  | 2 |
|  |  |  |  |  | (1461)VHQYFNVGLIQPGAVK(1476) | 590.5418 |  | 3 |
| 4 | CO3_BOVIN | *Bos taurus* | 271 | 7 | (136)TIYTPGSTVLYR(147) | 685.8668 | 187.253 | 2 |
|  |  |  |  |  | (362)FFKPAMPFDLMVYVTNPDGSPAR + 2 Oxidation (M)(384) | 878.0865 |  | 3 |
|  |  |  |  |  | (385)HIPVVTQGSNVQSLTQDDGVAK(406) | 765.0625 |  | 3 |
|  |  |  |  |  | (438)TMQALPYNTQGNSNNYLHLSVPR + Oxidation (M)(460) | 878.7560 |  | 3 |
|  |  |  |  |  | (438)TMQALPYNTQGNSNNYLHLSVPR + Oxidation (M)(460) | 879.0893 |  | 3 |
|  |  |  |  |  | (461)VELKPGETLNVNFHLR(476) | 467.2494 |  | 4 |
|  |  |  |  |  | (863)VELLYNPAFCSLATAK(878) | 898.9610 |  | 2 |
|  |  |  |  |  | (913)AAVYNHFISDGVK(925) | 474.2407 |  | 3 |
|  |  |  |  |  | (913)AAVYNHFISDGVK(925) | 474.5690 |  | 3 |
|  | 12 | CO3_HUMAN | *Homo sapiens* | 112 | 0 | (137)TIYTPGSTVLYR(148) | 685.8691 | 187.148 | 2 |
|  |  |  |  |  |  | (137)TIYTPGSTVLYR(148) | 685.8717 |  | 2 |
| Gelsolin | 7 | GELS_HORSE | *Equus caballus* | 45 | 1 | (565) TGAQELLR (572) | 444.2487 | 80.827 | 2 |
| Haptoglobin | 1 | HPT_CEREL | *Cervus elaphus* | 145 | 16 | (57)AGDGVYTFNNK(67) | 593.2720 | 44.690 | 2 |
|  |  |  |  |  | (156)IIGGSLDAK(164) | 437.2405 |  | 2 |
|  |  |  |  |  | (173)MVSHHNLISGATLINER + Oxidation (M)(189) | 636.6597 |  | 3 |
|  |  |  |  |  | (272)VGYVSGWGR(280) | 490.7365 |  | 2 |
|  |  |  |  |  | (320)SPVGVQPILNK(330) | 576.3248 |  | 2 |
|  |  |  |  |  | (386)VTSILDWVR(384) | 544.8015 |  | 2 |
| 2 | HPT_BOVIN | *Bos taurus* | 53 | 2 | (387)VTSILDWVR(395) | 544,8058 | 44.859 | 2 |
| Inter-alpha-trypsin inhibitor heavy chain H4 | 6 | ITIH4_BOVIN | *Bos taurus* | 81 | 1 | (100)AAAQEQYSAAVAR(112) | 668.3373 | 101.513 | 2 |
| Lactotransferrin | 10 | TRFL_CAMDR | *Camelus dromedarius* | 56 | 1 | (269)VPSHAVVAR(277) | 312.5070 | 77.211 | 3 |
| Serum albumin |  |  |  |  |  | (269)VPSHAVVAR(277) | 468.2681 |  | 2 |
| 3 | ALBU_BOVIN | *Bos taurus* | 43 | 1 | (569)TVMENFVAFVDK(580) | 700.0532 | 69.293 | 2 |
| 5 | ALBU_CANLF | *Canis lupus familiaris* | 61 | 2 | (438)KAPQVSTPTLVEVSR(452) | 537.8157 | 68.605 | 3 |
| 6 | ALBU_CANLF | *Canis lupus familiaris* | 80 | 2 | (438)KAPQVSTPTLVEVSR(452) | 537.9646 | 68.605 | 3 |
|  |  |  |  |  | (439)APQVSTPTLVEVSR(452) | 742.2487 |  | 2 |
| 9 | ALBU_BOVIN | *Bos taurus* | 61 | 1 | (569)TVMENFVAFVDK + Oxidation (M)(580) | 708.3466 | 69.293 | 2 |
| 10 | ALBU_BOVIN | *Bos taurus* | 185 | 8 | (168)RHPYFYAPELLYYANK(183) | 682.3405 | 69.293 | 3 |
|  |  |  |  |  | (360)RHPEYAVSVLLR(371) | 480.5998 |  | 3 |
|  |  |  |  |  | (548)KQTALVELLK(557) | 571.8565 |  | 2 |
|  |  |  |  |  | (569)TVMENFVAFVDK(580) | 700.3452 |  | 2 |
|  |  |  |  |  | (569)TVMENFVAFVDK + Oxidation (M)(580) | 708.3145 |  | 2 |
| 11 | ALBU_BOVIN | *Bos taurus* | 576 | 15 | (89)SLHTLFGDELCK(100) | 710.3402 | 69.293 | 2 |
|  |  |  |  |  | (168)RHPYFYAPELLYYANK(183) | 682.3317 |  | 3 |
|  |  |  |  |  | (168)RHPYFYAPELLYYANK(183) | 682.3385 |  | 3 |
|  |  |  |  |  | (168)RHPYFYAPELLYYANK(183) | 1023.0086 |  | 2 |
|  |  |  |  |  | (169)HPYFYAPELLYYANK(183) | 630.3031 |  | 3 |
|  |  |  |  |  | (210)HPYFYAPELLYYANK(218) | 944.9584 |  | 2 |
|  |  |  |  |  | (286)EKVLASSAR(297) | 481.2061 |  | 2 |
|  |  |  |  |  | (360)YICDNQDTISSK(371) | 722.2687 |  | 2 |
|  |  |  |  |  | (361)RHPEYAVSVLLR(371) | 720.3973 |  | 2 |
|  |  |  |  |  | (400)HPEYAVSVLLR(412) | 642.3505 |  | 2 |
|  |  |  |  |  | (400)LKHLVDEPQNLIK(412) | 773.8911 |  | 2 |
|  |  |  |  |  | (548)LKHLVDEPQNLIK(557) | 773.9003 |  | 2 |
|  |  |  |  |  | (548)KQTALVELLK(557) | 571.8488 |  | 2 |
|  |  |  |  |  | (569)KQTALVELLK(580) | 572.3494 |  | 2 |
|  |  |  |  |  | (569)TVMENFVAFVDK(580) | 700.3352 |  | 2 |
|  |  |  |  |  | (569)TVMENFVAFVDK(580) | 700.3451 |  | 2 |
|  |  |  |  |  | (569) TVMENFVAFVDK (580) | 700.8372 |  | 2 |
| 13 | ALBU_BOVIN | *Bos taurus* | 68 | 1 | (360)RHPEYAVSVLLR(371) | 480.6000 | 69.293 | 3 |
|  |  |  |  |  | (360)RHPEYAVSVLLR(371) | 480.6001 |  | 3 |
| Serotransferrin | 10 | TRFE_BOVIN | *Bos taurus* | 57 | 2 | (406)GEADAMSLDGGYLYIAGK + Oxidation (M)(423) | 923.8991 | 77.753 | 2 |
| Serpin A3–1 | 5 | SPA31_BOVIN | *Bos taurus* | 57 | 5 | (87)GSTLTEILEGLK(98) | 630.8521 | 46.237 | 2 |
|  |  |  |  |  | (395)DTQSIIFLGK(404) | 561.3113 |  | 2 |
| 9 | SPA31_BOVIN | *Bos taurus* | 96 | 5 | (87)GSTLTEILEGLK(98) | 630.8491 | 46.237 | 2 |
|  |  |  |  |  | (87)GSTLTEILEGLK(98) | 630.8491 |  | 2 |
|  |  |  |  |  | (395)DTQSIIFLGK(404) | 561.2893 |  | 2 |
| 10 | SPA31_BOVIN | *Bos taurus* | 96 | 5 | (87)GSTLTEILEGLK(98) | 630.8491 | 46.237 | 2 |
|  |  |  |  |  | (87)GSTLTEILEGLK(98) | 630.8491 |  | 2 |
|  |  |  |  |  | (395)DTQSIIFLGK(404) | 561.2893 |  | 2 |
| Thyroxine-binding globulin | 5 | THBG_PIG | *Sus scrofa* | 42 | 2 | (396)STRSILFLGK(405) | 561.3113 | 46.215 | 2 |
| 9 | THBG_PIG | *Sus scrofa* | 45 | 2 | (396)STRSILFLGK(405) | 561.3108 | 46.215 | 2 |
| 10 | THBG_PIG | *Sus scrofa* | 46 | 2 | (396)STRSILFLGK(405) | 561.2893 | 46.215 | 2 |

m/z: mass divided by charge number, MM: molecular mass, z: charge number
